# Supplementary material for: Phenolic Profile, Antioxidant Activity, and Chemometric Classification of Carob Pulp and Products
Source: MDPI journal article supplement (doi:10.3390/molecules28052269), 2023-02-28
Supplement: s1 [file s1]

**Table S1:** Total phenolic content and antioxidant activity of carobs and carob-derived products.

| Assays                                    | Carob pulp                     |                                | Carob Powder                   |                               |                                |                               |                               | Carob syrup                   |                               |                                |
|-------------------------------------------|--------------------------------|--------------------------------|--------------------------------|-------------------------------|--------------------------------|-------------------------------|-------------------------------|-------------------------------|-------------------------------|--------------------------------|
|                                           | Unroasted                      |                                | Roasted                        | Roasted                       |                                |                               | Unroasted                     | > 40 °C                       | < 40 °C                       |                                |
|                                           | Cyprus                         | Greece                         |                                | Italy                         | Cyprus                         | Greece                        |                               | Cyprus                        | Greece                        |                                |
| TPC (mg GAE/<br>g product)                | 7.20 ±<br>0.51 <sup>i</sup>    | 7.69 ±<br>0.08 <sup>i</sup>    | 12.28 ±<br>0.21 <sup>f</sup>   | 23.18 ±<br>0.55 <sup>a</sup>  | 21.04 ±<br>0.21 <sup>c</sup>   | 21.82 ±<br>0.76 <sup>b</sup>  | 18.19 ±<br>0.26 <sup>d</sup>  | 11.29 ±<br>0.67 <sup>g</sup>  | 9.51 ±<br>0.72 <sup>h</sup>   | 14.79 ±<br>0.64 <sup>e</sup>   |
| TPC (mg GAE/ g<br>extract)                | 14.92 ±<br>0.58 <sup>fg</sup>  | 16.21 ±<br>0.39 <sup>f</sup>   | 26.41 ±<br>0.14 <sup>d</sup>   | 47.46 ±<br>0.74 <sup>b</sup>  | 51.10 ±<br>0.68 <sup>a</sup>   | 50.60 ±<br>0.71 <sup>a</sup>  | 38.89 ±<br>2.47 <sup>c</sup>  | 15.95 ±<br>0.72 <sup>f</sup>  | 14.25 ±<br>0.69 <sup>g</sup>  | 20.83 ±<br>0.60 <sup>e</sup>   |
| DPPH (IC <sub>50</sub> mg<br>extract/ mL) | 488.47 ±<br>34.67 <sup>a</sup> | 466.17 ±<br>18.13 <sup>b</sup> | 361.00 ±<br>11.92 <sup>d</sup> | 98.83 ±<br>3.20 <sup>g</sup>  | 132.69 ±<br>1.04 <sup>f</sup>  | 143.85<br>± 1.97 <sup>f</sup> | 401.66 ±<br>1.06 <sup>c</sup> | 149.72 ±<br>9.40 <sup>f</sup> | 388.05 ±<br>1.75 <sup>c</sup> | 232.21 ±<br>19.58 <sup>e</sup> |
| FRAP (µmol<br>TE/g product)               | 73.94 ±<br>3.84 <sup>de</sup>  | 71.49 ±<br>2.61 <sup>e</sup>   | 89.22 ±<br>4.71 <sup>c</sup>   | 144.32 ±<br>7.16 <sup>a</sup> | 138.24 ±<br>12.92 <sup>a</sup> | 140.84<br>± 3.52 <sup>a</sup> | 119.41 ±<br>6.54 <sup>b</sup> | 48.58 ±<br>2.24 <sup>f</sup>  | 46.36 ±<br>6.48 <sup>f</sup>  | 82.23 ±<br>15.81 <sup>cd</sup> |

Different lower-case letters within the same row indicate significant differences ( $p < 0.05$ ) according to Duncan's multiple range test.

**Table S2: Data Matrix**

| Sample  | Sample Name                          | Matrix |
|---------|--------------------------------------|--------|
| S 1-3   | Carob pulp – Cyprus                  | Pulp   |
| S 4-6   | Carob pulp – Greece                  | Pulp   |
| S 7-9   | Roasted carob pulp – Greece          | Pulp   |
| S 10-12 | Roasted carob powder – Italy         | Powder |
| S 13-15 | Roasted carob powder – Cyprus        | Powder |
| S 16-18 | Roasted carob powder – Greece        | Powder |
| S 19-21 | Unroasted carob powder – Greece      | Powder |
| S 22-24 | Syrup thermally treated – Cyprus     | Syrup  |
| S 25-27 | Syrup thermally treated – Greece     | Syrup  |
| S 28-30 | Syrup non-thermally treated – Greece | Syrup  |

**Table S3:** Correlation matrix of original variables (phenolics, TPC, antioxidant activity).

[illegible]

**Table S4:** Misclassification table of OPLS-DA.

|                | M2 | Members | Correct | pulp | powder | syrup | No class (YPred <= 0) |
|----------------|----|---------|---------|------|--------|-------|-----------------------|
| pulp           |    | 9       | 100%    | 9    | 0      | 0     | 0                     |
| powder         |    | 12      | 100%    | 0    | 12     | 0     | 0                     |
| syrup          |    | 9       | 100%    | 0    | 0      | 9     | 0                     |
| No class       |    | 0       |         | 0    | 0      | 0     | 0                     |
| Total          |    | 30      | 100%    | 9    | 12     | 9     | 0                     |
| Fisher's prob. |    | 4,8e-13 |         |      |        |       |                       |

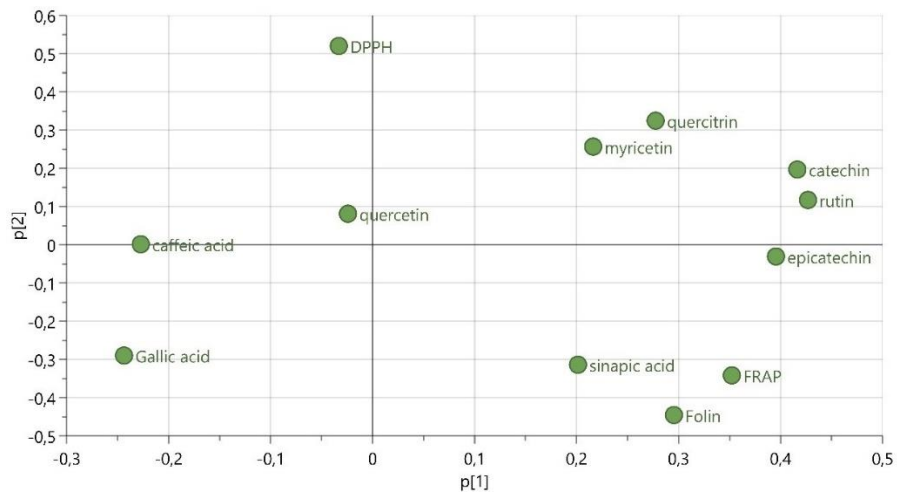

**Figure S1:** Loading score plot of the PCA model.

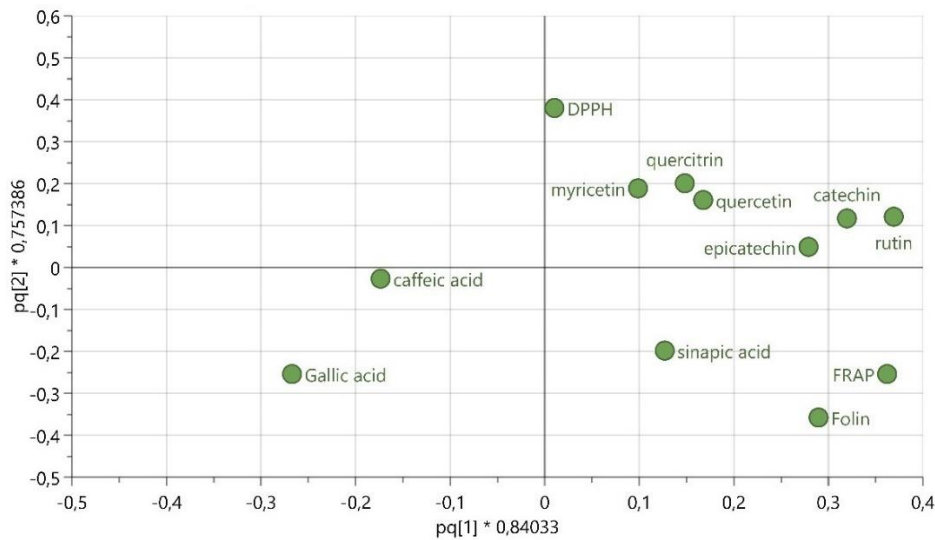

**Figure S2:** Loading score plot of the OPLS-DA model.
